# Supplementary material for: RIF1 Is Essential for 53BP1-Dependent Nonhomologous End Joining and Suppression of DNA Double-Strand Break Resection
Source: PubMed Central journal article supplement (PMC8260204; doi:10.1016/j.molcel.2021.06.015), 2021-07-01

**Molecular Cell, Volume 81**

**Supplemental information**

**RIF1 Is Essential for 53BP1-Dependent  
Nonhomologous End Joining and Suppression  
of DNA Double-Strand Break Resection**

**J. Ross Chapman, Patricia Barral, Jean-Baptiste Vannier, Valérie Borel, Martin Steger, Antonia Tomas-Loba, Alessandro A. Sartori, Ian R. Adams, Facundo D. Batista, and Simon J. Boulton**

**E - manuscript panel  
(incorrect HA blot)**

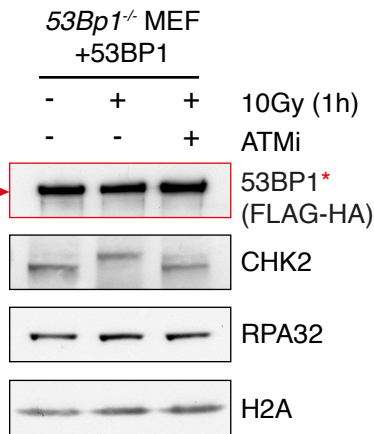

**F - manuscript panel (all correct)**

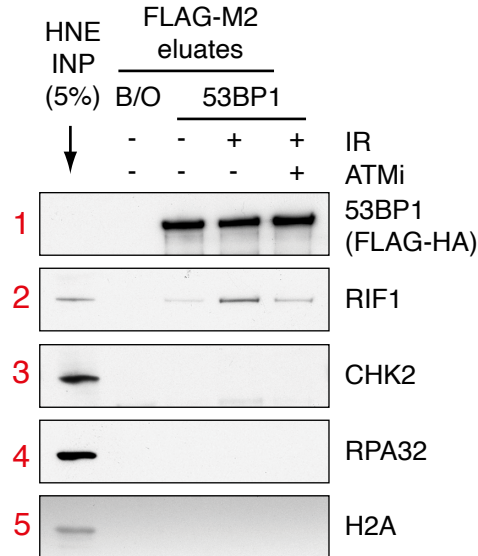

**E - manuscript panel  
(corrected HA-53BP1 blot)**

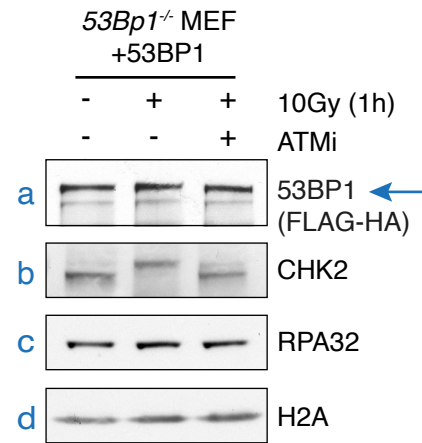

\*Flag-HA-53BP1 bands (detected with HA.11 mAb) in this panel were accidentally duplicated from Flag-HA-53BP1 pulldown bands below

Correct Flag-HA-53BP1 loading control

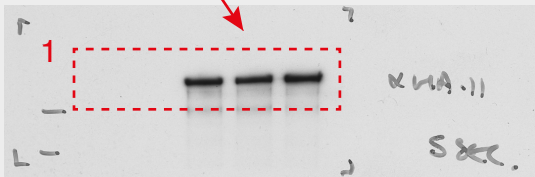

X/X indicate corresponding bands

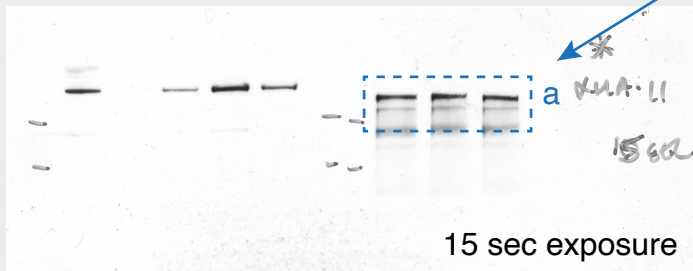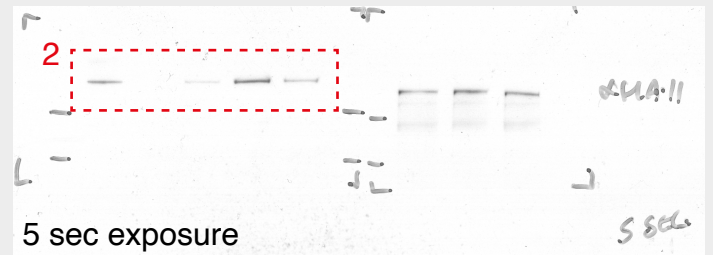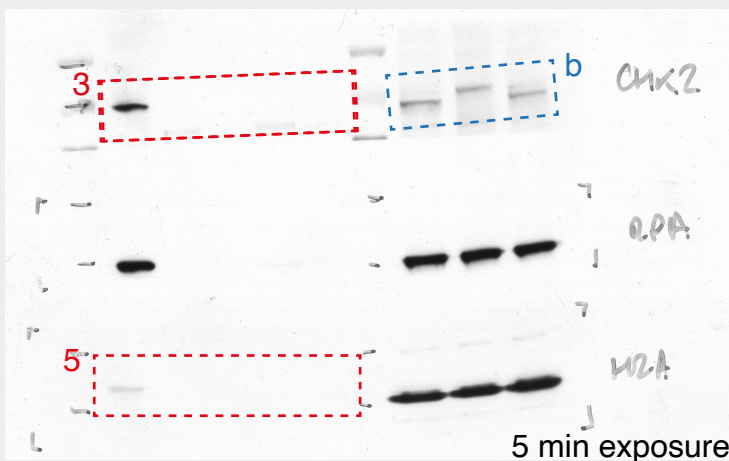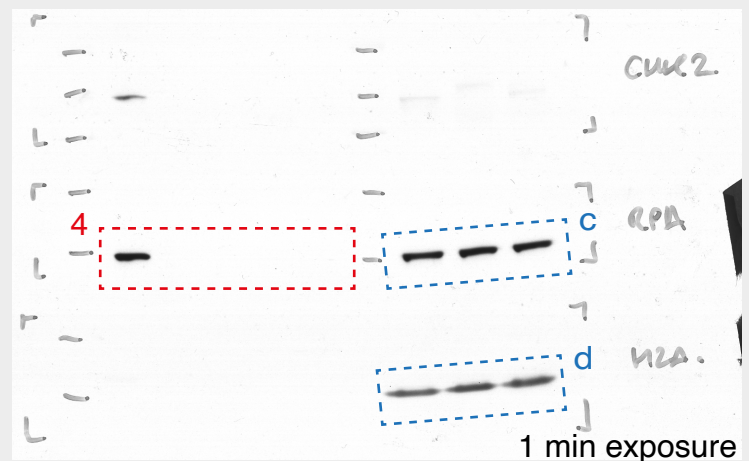

Supplement: mmc1.pdf [file mmc1.pdf]
